# Supplementary material for: Assay interference and off-target liabilities of reported histone acetyltransferase inhibitors
Source: PubMed Central journal article supplement (PMC5688144; doi:10.1038/s41467-017-01657-3), 2017-11-15
Supplement: 41467_2017_1657_MOESM2_ESM.pdf [file 41467_2017_1657_MOESM2_ESM.pdf]

## **Descriptions of Additional Supplementary Files**

File Name: Supplementary Dataset 1

Descriptions: File containing SMILES, activity data, and calculated descriptors for reported HAT inhibitors (CSV).

File Name: Supplementary Dataset 2

Descriptions: File containing list of publications and vendors used in the citation and vendor analyses (XLSX).
